# Supplementary material
Source: Springer Nature journal article supplement (https://www.springermedizin.de/resource/supplementary/12889_2012_4651_MOESM2_ESM.pdf/9490468)

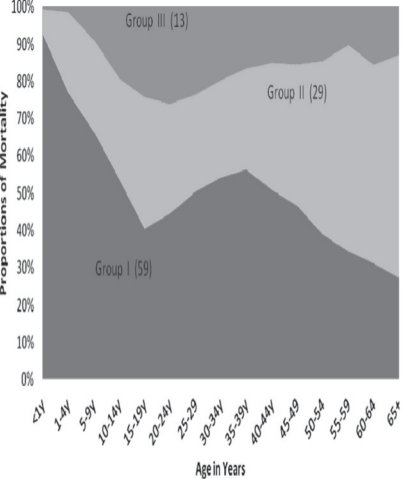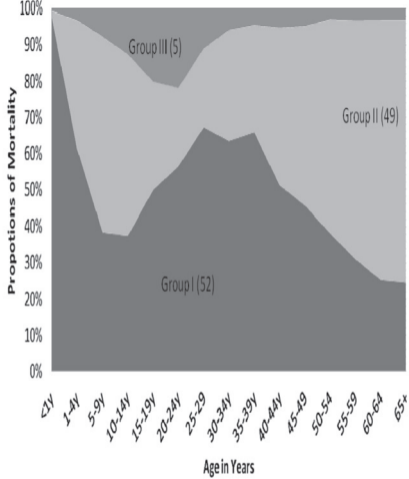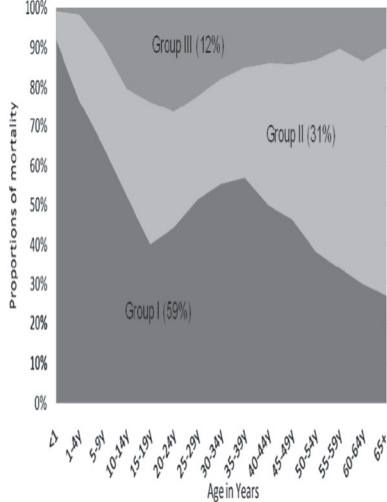

Supplement: MOESM2 [file 9490468]
